# Supplementary material for: Diagnostic yield and safety of transbronchial lung cryobiopsy and surgical lung biopsy in interstitial lung diseases: a systematic review and meta-analysis
Source: PubMed Central journal article supplement — Eur Respir Rev. 2022 Oct 5;31(166):210280. doi: 10.1183/16000617.0280-2021 (PMC9724793; doi:10.1183/16000617.0280-2021), 2022-10-05
Supplement: ERR-0280-2021.SUPPLEMENT.pdf [file ERR-0280-2021.SUPPLEMENT.pdf]

## **Online data supplement**

### Diagnostic Yield and Safety of Transbronchial Lung Cryobiopsy and Surgical Lung Biopsy in Interstitial Lung Diseases – a systematic review and meta-analysis

Inês Rodrigues, Ricardo Gomes, Lígia Maria Coutinho, Maria Teresa Rego, Firmino Machado, António Morais, Hélder Novais Bastos

#### ***Index***

|                                                                                                               |             |
|---------------------------------------------------------------------------------------------------------------|-------------|
| <i>Supplementary Table 1 - Characteristics of the included studies</i> _____                                  | <i>p.3</i>  |
| <i>Supplementary Table 2 - Summary of the characteristics of the included studies by type and region</i> ____ | <i>p.4</i>  |
| <i>Supplementary Table 3 - Biopsy method and characteristics of samples</i> _____                             | <i>p.5</i>  |
| <i>Supplementary Table 4 - Quality Assessment of studies (CASP Cohort Study Checklist)</i> _____              | <i>p.7</i>  |
| <i>Supplementary Table 5 - Quality Assessment of studies (CASP Diagnostic Study Checklist)</i> _____          | <i>p.9</i>  |
| <i>Supplementary Table 6 - Quality Assessment of studies (CASP Randomised Controlled Trial Checklist)</i> _   | <i>p.10</i> |
| <i>Supplementary Figure 1 - Acute ILD exacerbation after TBLC</i> _____                                       | <i>p.11</i> |
| <i>Supplementary Figure 2 - Complications after VATS</i> _____                                                | <i>p.12</i> |

Supplementary Table 1 - Characteristics of the included studies

| First Author (Year)                     | Country       | Study Design              | Biopsy method | Subjects, N | Age *          | Male % (male/female) |
|-----------------------------------------|---------------|---------------------------|---------------|-------------|----------------|----------------------|
| Frutcher (2014) <sup>41</sup>           | Israel        | Retrospective cohort      | TBLC          | 75          | 56.2 (± 16.0)  | 55 (41/34)           |
| Griff (2014) <sup>32</sup>              | Germany       | Retrospective cohort      | TBLC          | 52          | 63.0 (± 13.0)  | 69 (36/16)           |
| Pajares (2014) <sup>40</sup>            | Spain         | Randomized clinical trial | TBLC          | 39          | 60.0 (± 10,3)  | 51 (20/19)           |
| Hernández-González (2015) <sup>42</sup> | Spain         | Retrospective cohort      | TBLC          | 33          | 64.0 (30-79)   | 33 (11/22)           |
| Cascante (2016) <sup>45</sup>           | Spain         | Prospective cohort        | TBLC          | 55          | 58.8 (± 8.9)   | 58 (32/23)           |
| Kronborg-White (2016) <sup>43</sup>     | Denmark       | Prospective cohort        | TBLC          | 38          | 61.0 (29–80)** | 58 (22/16)           |
| Ramaswamy (2016) <sup>44</sup>          | United States | Retrospective cohort      | TBLC          | 56          | 60.0 (± 12.0)  | 54 (30/26)           |
| Bango-Álvarez (2017) <sup>22</sup>      | Spain         | Prospective cohort        | TBLC          | 106         | 60.0 (33-81)   | 65 (69/37)           |
| Lentz (2017) <sup>46</sup>              | United States | Retrospective cohort      | TBLC          | 104         | 58.2 (20-83)   | 56 (58/46)           |
| Linhas (2017) <sup>24</sup>             | Portugal      | Prospective cohort        | TBLC          | 90          | 60.0 (± 13.0)  | 59 (53/37)           |
| Cho (2018) <sup>23</sup>                | United States | Retrospective cohort      | TBLC          | 40          | 57.2 (± 13.0)  | 70 (28/12)           |
| Cooley (2018) <sup>25</sup>             | United States | Retrospective cohort      | TBLC          | 159         | 57.0 (± 14.0)  | 46 (73/86)           |
| Dhooria (2018) <sup>26</sup>            | India         | Retrospective cohort      | TBLC          | 128         | 51.3 (± 13.9)  | 41 (53/75)           |
| Abdelghani (2019) <sup>27</sup>         | United States | Prospective cohort        | TBLC          | 40          | 63.0 (26-82)   | 60 (24/16)           |
| Çirak (2019) <sup>30</sup>              | Turkey        | Retrospective cohort      | TBLC          | 82          | 58.4 (±9.33)   | 54 (44/38)           |
| Hagmeyer (2019) <sup>29</sup>           | Germany       | Cross sectional           | TBLC          | 61          | 66.0 (± 11.0)  | 59 (36/25)           |
| Harari (2019) <sup>28</sup>             | Italy         | Retrospective cohort      | TBLC          | 73          | 66.6 (± 8.6)   | 62 (45/28)           |
| Hetzel (2019) <sup>18</sup>             | Germany       | Prospective cohort        | TBLC          | 359         | 62.8 (± 14.0)  | 55 (198/153)         |
| Samitas (2019) <sup>15</sup>            | Canada        | Retrospective cohort      | TBLC          | 50          | 61.0 (43–81)** | 58 (29/21)           |
| Shafiek (2019) <sup>31</sup>            | Egypt         | Randomized clinical trial | TBLC          | 12          | 45.6 (± 9.2)   | 33 (4/8)             |
| Aburto (2020) <sup>37</sup>             | Spain         | Prospective cohort        | TBLC          | 257         | 63.3 (± 11.8)  | 65 (166/91)          |
| Bondue (2020) <sup>34</sup>             | Belgium       | Prospective cohort        | TBLC          | 81          | 62.0 (26–81)** | 49 (40/41)           |
| Gnass (2020) <sup>38</sup>              | Poland        | Prospective cohort        | TBLC          | 114         | 54.0 (±14)     | 52 (59/55)           |
| Hussein (2020) <sup>39</sup>            | Egypt         | Prospective cohort        | TBLC          | 23          | 46.2 (± 13.5)  | 35 (8/15)            |
| Koslow (2020) <sup>33</sup>             | United States | Retrospective cohort      | TBLC          | 120         | 62.0 (± 14.0)  | 56 (67/53)           |
| Pajares (2020) <sup>40</sup>            | Spain         | Prospective cohort        | TBLC          | 124         | 65.7 (± 11.9)  | 58 (72/52)           |
| Wang (2020) <sup>36</sup>               | China         | Prospective cohort        | TBLC          | 70          | 62.7 (± 8.4)   | 34 (24/46)           |
| Ravaglia (2016) <sup>59</sup>           | Italy         | Retrospective             | TBLC          | 297         | 60.0 (21–78)** | 58 (172/125)         |

|                                |                |                      |             |         |                    |              |
|--------------------------------|----------------|----------------------|-------------|---------|--------------------|--------------|
|                                |                | cohort               | VATS        | 150     | 59.0 (15-74)**     | 57 (85/65)   |
| Romagnoli (2019) <sup>61</sup> | France, Italy  | Cross sectional      | TBLC        | 21      | 65.0 (60-69)**     | 48 (10/11)   |
|                                |                |                      | VATS        | 21      |                    | 48 (10/11)   |
| Troy (2019) <sup>60</sup>      | Australia      | Cross sectional      | TBLC        | 65      | 66.1 ( $\pm$ 9.3)  | 48 (31/34)   |
|                                |                |                      | VATS        | 65      | 66.1 ( $\pm$ 9.3)  | 48 (31/34)   |
| Fibla (2012) <sup>2</sup>      | Spain          | Prospective cohort   | VATS        | 224     | 57.1 (25-77)       | 48 (106/118) |
| Kayatta (2013) <sup>52</sup>   | United Kingdom | Retrospective cohort | VATS        | 194     | 58.0               | 52 (113/81)  |
| Luo (2013) <sup>51</sup>       | China          | Retrospective cohort | VATS        | 32      | 52.2 (30-76)       | 63 (20/12)   |
| Pompeo (2013) <sup>47</sup>    | Italy          | Prospective cohort   | VATS        | 30      | 62.0 ( $\pm$ 10)   | 50 (15/15)   |
| Morris (2014) <sup>53</sup>    | United Kingdom | Retrospective cohort | VATS        | 66      | 58.9               | 47 (31/35)   |
| Bagheri (2015) <sup>54</sup>   | Iran           | Retrospective cohort | VATS        | 38      | 47.7 (22-79)       | 50 (19/19)   |
| Samejima (2015) <sup>55</sup>  | Japan          | Retrospective cohort | VATS        | 285     | 65.0 (18-85)**     | 57 (161/124) |
| Khalil (2016) <sup>56</sup>    | United Kingdom | Retrospective cohort | VATS        | 115     | NA                 | NA           |
| Lieberman (2017) <sup>57</sup> | United States  | Retrospective cohort | VATS<br>OLB | 45<br>2 | 57.4 ( $\pm$ 12.8) | 44.7 (21/26) |
| Jeon (2018) <sup>58</sup>      | South Korea    | Retrospective cohort | VATS        | 35      | NA                 | 54 (19/16)   |
| Sugino (2019) <sup>48</sup>    | Japan          | Retrospective cohort | VATS        | 143     | 64.0 (33-81)**     | 48 (69/74)   |
| Cherchi (2020) <sup>50</sup>   | Italy          | Retrospective cohort | VATS        | 99      | 66.0 ( $\pm$ 10)   | 73 (74/26)   |
| Pastre (2020) <sup>49</sup>    | United States  | Retrospective cohort | VATS        | 268     | 63.0 ( $\pm$ 13)   | 54 (144/124) |

\* Results are presented as mean ( $\pm$  standard deviation or range) unless stated otherwise

\*\* Median (range)

Supplementary Table 2 - Summary of the characteristics of the included studies by type and region

|                        |                             | TBLC | VATS |
|------------------------|-----------------------------|------|------|
| <b>Study design, n</b> | Retrospective cohort        | 13 * | 12 * |
|                        | Prospective cohort          | 12   | 2    |
|                        | Cross sectional             | 3 ** | 2 ** |
|                        | Randomized controlled trial | 2*** | 0    |
|                        | Total                       | 30   | 16   |
| <b>Continent, n</b>    | Europe                      | 16 † | 7 †  |
|                        | North America               | 7    | 3    |
|                        | Asia                        | 4    | 5    |
|                        | Australia                   | 1 ‡  | 1 ‡  |
|                        | Africa                      | 2    | 0    |
|                        | Total                       | 30   | 16   |

\* One of the retrospective cohorts deals with TBLC and SLB.

\*\* Two of the cross sectional studies deal with TBLC and SLB.

\*\*\* Two randomized controlled trial comparing TBLC with conventional forceps sampling.

† Two of the European cohorts deal with TBLC and SLB.

‡ The Australian cohort deals with TBLC and SLB.

Supplementary Table 3 - Biopsy method and characteristics of samples

| First Author (Year)                     | Biopsy method (n) | No. of Samples/Subject* | Surface Area of Samples, mm <sup>2</sup> * | Diameter, mm* | Cryoprobe Diameter (mm) | Cooling time (s) | UIP pattern, n (%) |
|-----------------------------------------|-------------------|-------------------------|--------------------------------------------|---------------|-------------------------|------------------|--------------------|
| Frutcher (2014) <sup>41</sup>           | TBLC (75)         | 3 (2-4)                 | 9 (6-18)                                   | NA            | 2.4                     | 4                | 7 (9.3)            |
| Griff (2014) <sup>32</sup>              | TBLC (52)         | 1-2                     | NA                                         | 6.9 (± 4.4)   | 1.9                     | 3-5              | 11 (21.0)          |
| Pajares (2014) <sup>40</sup>            | TBLC (39)         | 3.7 (± 0.9)             | 14.7 (± 11)                                | 4.1 (± 1.5)   | 2.4                     | 3-4              | 7 (17.9)           |
| Hernández-González (2015) <sup>42</sup> | TBLC (33)         | 2.7 (0-5)               | NA                                         | 4 (± 1.7)     | 1.9                     | 3-4              | 6 (18.2)           |
| Cascante (2016) <sup>45</sup>           | TBLC (55)         | 2.8 (1-5)               | 20.7 (2-42)                                | NA            | 2.4                     | 3-4              | 18 (32.7)          |
| Kronborg-White (2016) <sup>43</sup>     | TBLC (38)         | 4**                     | NA                                         | 6.4 (± 2.5)   | 1.9 or 2.4              | 5 to 7           | 10 (26.3)          |
| Ramaswamy (2016) <sup>44</sup>          | TBLC (56)         | 2 (1-4)                 | NA                                         | 4 – 26        | 2.4                     | 4-5              | NA                 |
| Bango-Álvarez (2017) <sup>22</sup>      | TBLC (106)        | 3                       | 15.7 (± 9)                                 | 5.1           | 1.9                     | 5                | 22 (20.8)          |
| Lentz (2017) <sup>46</sup>              | TBLC (104)        | 2.2 (± 0.6)             | NA                                         | 6.9           | 1.9                     | 4-5              | 19 (18.3)          |
| Linhas (2017) <sup>24</sup>             | TBLC (90)         | NA                      | NA                                         | NA            | 2.4                     | 5                | 18 (20.0)          |
| Cho (2018) <sup>23</sup>                | TBLC (40)         | 5.17 (± 1.2)            | 40.0 (± 2)                                 | 5.7 (± 2)     | 1.9                     | 4-12             | 1 (3.0)            |
| Cooley (2018) <sup>25</sup>             | TBLC (159)        | 4.9 (± 1.47)            | NA                                         | 6.1 (± 2.2)   | 1.9 or 2.4              | 6.1 (± 1.3)      | 11 (6.9)           |
| Dhooia (2018) <sup>26</sup>             | TBLC (128)        | 3 (1-7)**               | NA                                         | 5 (2-10)**    | 1.9                     | 5 (3-8)          | 11 (8.6)           |
| Abdelghani (2019) <sup>27</sup>         | TBLC (40)         | 3.45 (± 1.2)            | 36.2 (± 21.5)                              | NA            | 1.9                     | 5-7              | 15 (37.5)          |
| Çirak (2019) <sup>30</sup>              | TBLC (82)         | 3                       | NA                                         | 2 – 3         | 2.4                     | 3 to 6           | 21 (25.6)          |
| Hagmeyer (2019) <sup>29</sup>           | TBLC (61)         | NA                      | NA                                         | NA            | 1.9                     | 3-4              | 18 (29.5)          |
| Harari (2019) <sup>28</sup>             | TBLC (73)         | 3-4                     | NA                                         | 5             | 1.9                     | 3-6              | 39 (61.0)          |
| Hetzel (2019) <sup>18</sup>             | TBLC (359)        | 3.2 (± 1.2)             | NA                                         | NA            | 1.9 or 2.4              | 3 to 7           | NA                 |
| Samitas (2019) <sup>15</sup>            | TBLC (50)         | 2.75 (± 0.9)            | NA                                         | 5.2 (± 1.83)  | 1.9                     | 3-5              | 3 (6.0)            |
| Shafiek (2019) <sup>31</sup>            | TBLC (12)         | 2-4                     | NA                                         | 3.9 (± 1.2)   | 2.4                     | NA               | NA                 |
| Aburto (2020) <sup>37</sup>             | TBLC (257)        | 4 (1-5)**               | NA                                         | NA            | 2.4                     | 4                | NA                 |
| Bondue (2020) <sup>34</sup>             | TBLC (81)         | 4 (1-5)                 | 20.9 (9-44)                                | NA            | 1.9 or 2.4              | NA               | 21 (26.0)          |
| Gnass (2020) <sup>38</sup>              | TBLC (114)        | 2-5                     | NA                                         | 7 (5-10)      | 1.9                     | 5-8              | 8 (7.0)            |
| Hussein (2020) <sup>39</sup>            | TBLC (23)         | 2-3                     | NA                                         | 10.2 (± 1.4)  | 2.4                     | 3 to 6           | 2 (8.7)            |
| Koslow (2020) <sup>33</sup>             | TBLC (120)        | 3-6                     | NA                                         | NA            | 1.9                     | 3-7              | NA                 |
| Pajares (2020) <sup>40</sup>            | TBLC (124)        | 3.5                     | NA                                         | NA            | 2.4                     | 3-4              | 10 (8.1)           |
| Wang (2020) <sup>36</sup>               | TBLC (70)         | NA                      | NA                                         | NA            | 2.4                     | NA               | 4 (5.7)            |

|                                |                      |                  |      |                    |            |                  |           |
|--------------------------------|----------------------|------------------|------|--------------------|------------|------------------|-----------|
| Ravaglia (2016) <sup>59</sup>  | TBLC (297)           | 1-8              | 44.4 | NA                 | 2.4        | 5                | 92 (31)   |
|                                | VATS (150)           | NA               | NA   | NA                 | -          | -                | 74 (49.3) |
| Romagnoli (2019) <sup>61</sup> | TBLC (21)            | 5 (2-6)**        | NA   | 7 (5-8)**          | 2.4        | 5-6              | 9 (42.9)  |
|                                | VATS (21)            | 2                | NA   | 46.1 ( $\pm$ 13.8) | -          | -                | 8 (38.1)  |
| Troy (2019) <sup>60</sup>      | TBLC (65)            | 5 (3-7)**        | NA   | 7.1 ( $\pm$ 1.9)   | 1.9 or 2.4 | 4.6 ( $\pm$ 0.7) | 41 (63.0) |
|                                | VATS (65)            | NA               | NA   | 46.5 ( $\pm$ 14.9) | -          | -                | 39 (60.0) |
| Fibla (2012) <sup>2</sup>      | VATS (224)           | 1-2              | NA   | NA                 | -          | -                | NA        |
| Kayatta (2013) <sup>52</sup>   | VATS (196)           | 2-3              | NA   | NA                 | -          | -                | 83 (42.0) |
| Luo (2013) <sup>51</sup>       | VATS (32)            | 1-2              | NA   | NA                 | -          | -                | 4 (12.5)  |
| Pompeo (2013) <sup>47</sup>    | VATS (30)            | 1.8 ( $\pm$ 0.4) | NA   | NA                 | -          | -                | 13 (43.3) |
| Morris (2014) <sup>53</sup>    | VATS (66)            | NA               | NA   | NA                 | -          | -                | 19 (28.8) |
| Bagheri (2015) <sup>54</sup>   | VATS (38)            | NA               | NA   | NA                 | -          | -                | 9 (23.7)  |
| Samejima (2015) <sup>55</sup>  | VATS (285)           | 2 (1-3)          | NA   | NA                 | -          | -                | NA        |
| Khalil (2016) <sup>56</sup>    | VATS (115)           | 1-3              | NA   | NA                 | -          | -                | 31 (27.0) |
| Lieberman (2017) <sup>57</sup> | VATS (45)<br>OLB (2) | NA               | NA   | NA                 | -          | -                | NA        |
| Jeon (2018) <sup>58</sup>      | VATS (35)            | NA               | NA   | NA                 | -          | -                | 12 (34.3) |
| Sugino (2019) <sup>48</sup>    | VATS (143)           | 1-3              | NA   | NA                 | -          | -                | 31 (21.7) |
| Cherchi (2020) <sup>50</sup>   | VATS (99)            | 1.2 ( $\pm$ 0.4) | NA   | NA                 | -          | -                | 60 (61.0) |
| Pastre (2020) <sup>49</sup>    | VATS (268)           | NA               | NA   | NA                 | -          | -                | 67 (25.0) |

\*Results are presented as mean ( $\pm$  standard deviation or range) or range unless stated otherwise

\*\* Median (range)

Supplementary Table 4 - Quality Assessment of studies (CASP Cohort Study Checklist)

| CASP Cohort Study Checklist             |                       |                  |                   |                  |                                           |                                          |                                       |                                   |         |                      |                    |                                                    |                                   |                            |
|-----------------------------------------|-----------------------|------------------|-------------------|------------------|-------------------------------------------|------------------------------------------|---------------------------------------|-----------------------------------|---------|----------------------|--------------------|----------------------------------------------------|-----------------------------------|----------------------------|
| First Author (Year)                     | Validity of the study |                  |                   |                  |                                           |                                          |                                       |                                   | Results |                      |                    | Usefulness of results                              |                                   |                            |
|                                         | Focused issue         | Cohort recruited | Exposure measured | Outcome measured | Identification of the confounding factors | Consideration of the confounding factors | Follow up of subjects complete enough | Follow up of subjects long enough | Results | Precision of results | Believe in results | Application of the results in the local population | Fit with other available evidence | Implications of this study |
| Frutcher (2014) <sup>41</sup>           | Green                 | Green            | Green             | Green            | Red                                       | Red                                      | Yellow                                | Yellow                            | Green   | Yellow               | Yellow             | Green                                              | Green                             | Yellow                     |
| Griff (2014) <sup>32</sup>              | Green                 | Yellow           | Green             | Green            | Red                                       | Red                                      | Green                                 | Green                             | Green   | Yellow               | Yellow             | Green                                              | Green                             | Yellow                     |
| Hernández-González (2015) <sup>42</sup> | Green                 | Green            | Green             | Green            | Red                                       | Red                                      | Yellow                                | Yellow                            | Green   | Yellow               | Yellow             | Green                                              | Green                             | Yellow                     |
| Cascante (2016) <sup>45</sup>           | Green                 | Green            | Green             | Green            | Green                                     | Green                                    | Green                                 | Green                             | Green   | Yellow               | Yellow             | Green                                              | Green                             | Yellow                     |
| Kronborg-White (2016) <sup>43</sup>     | Green                 | Green            | Green             | Green            | Red                                       | Red                                      | Yellow                                | Yellow                            | Green   | Green                | Yellow             | Green                                              | Green                             | Yellow                     |
| Ramaswamy (2016) <sup>44</sup>          | Green                 | Green            | Green             | Green            | Green                                     | Green                                    | Green                                 | Green                             | Green   | Yellow               | Yellow             | Green                                              | Green                             | Yellow                     |
| Ravaglia (2016) <sup>59</sup>           | Green                 | Red              | Green             | Green            | Green                                     | Green                                    | Green                                 | Green                             | Green   | Green                | Yellow             | Green                                              | Green                             | Yellow                     |
| Bango-Álvarez (2017) <sup>22</sup>      | Green                 | Green            | Green             | Green            | Red                                       | Red                                      | Red                                   | Red                               | Green   | Yellow               | Yellow             | Green                                              | Green                             | Yellow                     |
| Lentz (2017) <sup>46</sup>              | Green                 | Green            | Green             | Green            | Yellow                                    | Red                                      | Green                                 | Green                             | Green   | Green                | Yellow             | Green                                              | Green                             | Yellow                     |
| Linhas (2017) <sup>24</sup>             | Green                 | Green            | Green             | Green            | Green                                     | Green                                    | Green                                 | Yellow                            | Green   | Green                | Yellow             | Green                                              | Green                             | Yellow                     |
| Cho (2018) <sup>23</sup>                | Green                 | Green            | Green             | Green            | Green                                     | Green                                    | Yellow                                | Yellow                            | Green   | Green                | Yellow             | Green                                              | Green                             | Yellow                     |
| Cooley (2018) <sup>25</sup>             | Green                 | Green            | Green             | Green            | Green                                     | Green                                    | Green                                 | Green                             | Green   | Yellow               | Yellow             | Green                                              | Green                             | Yellow                     |
| Dhooria (2018) <sup>26</sup>            | Green                 | Green            | Green             | Green            | Green                                     | Green                                    | Yellow                                | Yellow                            | Green   | Green                | Yellow             | Green                                              | Green                             | Yellow                     |
| Abdelghani (2019) <sup>27</sup>         | Green                 | Green            | Green             | Green            | Red                                       | Red                                      | Yellow                                | Yellow                            | Green   | Yellow               | Yellow             | Green                                              | Green                             | Yellow                     |

|                                |       |        |        |       |       |        |        |        |        |        |        |        |       |        |
|--------------------------------|-------|--------|--------|-------|-------|--------|--------|--------|--------|--------|--------|--------|-------|--------|
| Çirak (2019) <sup>30</sup>     | Green | Yellow | Green  | Green | Red   | Red    | Yellow | Yellow | Green  | Green  | Green  | Green  | Green | Green  |
| Harari (2019) <sup>28</sup>    | Green | Yellow | Green  | Green | Red   | Red    | Green  | Green  | Green  | Yellow | Yellow | Green  | Green | Yellow |
| Hetzl (2019) <sup>18</sup>     | Green | Green  | Green  | Green | Green | Green  | Green  | Green  | Green  | Green  | Green  | Green  | Green | Green  |
| Samitas (2019) <sup>15</sup>   | Green | Green  | Green  | Green | Red   | Red    | Red    | Red    | Green  | Yellow | Yellow | Green  | Green | Yellow |
| Aburto (2020) <sup>37</sup>    | Green | Green  | Green  | Green | Green | Green  | Green  | Green  | Green  | Green  | Green  | Green  | Green | Green  |
| Bondue (2020) <sup>34</sup>    | Green | Green  | Green  | Green | Red   | Red    | Green  | Green  | Green  | Yellow | Yellow | Yellow | Green | Yellow |
| Gnass (2020) <sup>38</sup>     | Green | Green  | Green  | Green | Red   | Red    | Yellow | Yellow | Green  | Yellow | Yellow | Green  | Green | Yellow |
| Hussein (2020) <sup>39</sup>   | Green | Yellow | Green  | Green | Red   | Red    | Yellow | Yellow | Green  | Green  | Green  | Green  | Green | Green  |
| Koslow (2020) <sup>33</sup>    | Green | Green  | Green  | Green | Green | Green  | Green  | Green  | Green  | Green  | Green  | Green  | Green | Green  |
| Pajares (2020) <sup>40</sup>   | Green | Green  | Green  | Red   | Red   | Red    | Green  | Green  | Green  | Green  | Green  | Green  | Green | Green  |
| Wang (2020) <sup>36</sup>      | Red   | Green  | Yellow | Red   | Red   | Red    | Green  | Green  | Green  | Yellow | Yellow | Green  | Green | Yellow |
| Fibla (2012) <sup>2</sup>      | Green | Green  | Green  | Green | Red   | Red    | Green  | Green  | Green  | Yellow | Yellow | Green  | Green | Yellow |
| Kayatta (2013) <sup>52</sup>   | Green | Green  | Green  | Green | Red   | Red    | Green  | Green  | Green  | Yellow | Yellow | Green  | Green | Yellow |
| Luo (2013) <sup>51</sup>       | Green | Green  | Green  | Green | Green | Green  | Green  | Green  | Green  | Green  | Green  | Green  | Green | Green  |
| Pompeo (2013) <sup>47</sup>    | Green | Yellow | Red    | Red   | Red   | Red    | Red    | Green  | Red    | Red    | Red    | Red    | Red   | Red    |
| Morris (2014) <sup>53</sup>    | Green | Yellow | Red    | Red   | Red   | Red    | Red    | Green  | Red    | Red    | Red    | Red    | Red   | Red    |
| Bagheri (2015) <sup>54</sup>   | Green | Green  | Green  | Green | Red   | Red    | Red    | Red    | Green  | Yellow | Yellow | Green  | Green | Yellow |
| Samejima (2015) <sup>55</sup>  | Green | Green  | Green  | Green | Green | Red    | Green  | Green  | Green  | Yellow | Yellow | Green  | Green | Yellow |
| Khalil (2016) <sup>56</sup>    | Green | Green  | Green  | Green | Red   | Red    | Green  | Green  | Green  | Yellow | Yellow | Green  | Green | Yellow |
| Lieberman (2017) <sup>57</sup> | Green | Green  | Green  | Green | Red   | Red    | Green  | Green  | Green  | Yellow | Yellow | Green  | Green | Yellow |
| Jeon (2018) <sup>58</sup>      | Green | Red    | Green  | Green | Green | Yellow | Green  | Green  | Yellow | Yellow | Yellow | Green  | Green | Yellow |
| Sugino (2019) <sup>48</sup>    | Green | Green  | Green  | Green | Red   | Red    | Green  | Green  | Green  | Yellow | Yellow | Green  | Green | Yellow |
| Cherchi (2020) <sup>50</sup>   | Green | Green  | Green  | Green | Green | Green  | Green  | Green  | Green  | Green  | Green  | Green  | Green | Green  |
| Pastre (2020) <sup>49</sup>    | Green | Red    | Green  | Red   | Green | Green  | Red    | Green  | Green  | Yellow | Yellow | Green  | Green | Yellow |



Supplementary Table 5 - Quality Assessment of studies (CASP Diagnostic Study Checklist)

| CASP Diagnostic Study Checklist |                       |                             |                         |                     |                |         |         |                    |                                                    |                                                 |                         |                       |
|---------------------------------|-----------------------|-----------------------------|-------------------------|---------------------|----------------|---------|---------|--------------------|----------------------------------------------------|-------------------------------------------------|-------------------------|-----------------------|
| First Author<br>(Year)          | Validity of the study |                             |                         |                     |                |         |         |                    | Results                                            |                                                 |                         | Usefulness of results |
|                                 | Clear question        | comparison with a reference | Patients get both tests | Reference influence | disease status | methods | results | Believe in results | Application of the results in the local population | Application of the test in the local population | All outcomes considered | Impact of the test    |
| Hagmeyer (2019) <sup>18</sup>   | Green                 | Red                         | Red                     | Red                 | Red            | Green   | Red     | Yellow             | Yellow                                             | Yellow                                          | Yellow                  | Yellow                |
| Romagnoli (2019) <sup>61</sup>  | Green                 | Green                       | Green                   | Green               | Green          | Green   | Green   | Green              | Green                                              | Green                                           | Green                   | Green                 |
| Troy (2019) <sup>60</sup>       | Green                 | Green                       | Green                   | Green               | Green          | Green   | Green   | Green              | Green                                              | Green                                           | Green                   | Green                 |

Supplementary Table 6 - Quality Assessment of studies (CASP Randomised Controlled Trial Checklist)

| CASP Randomised Controlled Trial Checklist |                       |                             |                                   |                    |                      |                                      |                  |                                   |                                                    |                                         |                                        |
|--------------------------------------------|-----------------------|-----------------------------|-----------------------------------|--------------------|----------------------|--------------------------------------|------------------|-----------------------------------|----------------------------------------------------|-----------------------------------------|----------------------------------------|
| First Author (Year)                        | Validity of the study |                             |                                   |                    |                      | Results                              |                  | Usefulness of results             |                                                    |                                         |                                        |
|                                            | Focused issue         | Randomization of treatments | Patients accounted for conclusion | Blind to treatment | Similarity of groups | Equality of treatments within groups | Treatment effect | Precision of the treatment effect | Application of the results in the local population | Consideration of the important outcomes | Analysis of benefits, harms, and costs |
| Pajares (2014) <sup>40</sup>               | Green                 | Green                       | Green                             | Red                | Yellow               | Green                                | Green            | Red                               | Green                                              | Green                                   | Yellow                                 |
| Shafiek (2019) <sup>31</sup>               | Green                 | Green                       | Green                             | Red                | Green                | Green                                | Green            | Red                               | Green                                              | Green                                   | Yellow                                 |

Supplementary Figure 1 - Acute ILD exacerbation after TBLC. The diamond indicates the pooled effect.

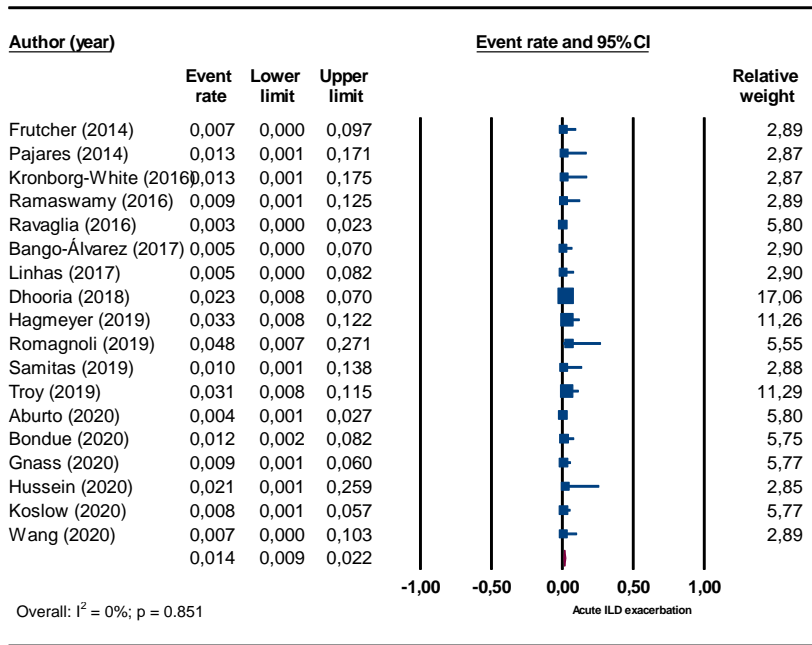

Supplementary Figure 2 - Complications after VATS: a) Pneumonia/empyema; b) thoracic pain; c) persistent air-leak; d) acute ILD exacerbation. The diamond indicates the pooled effect.

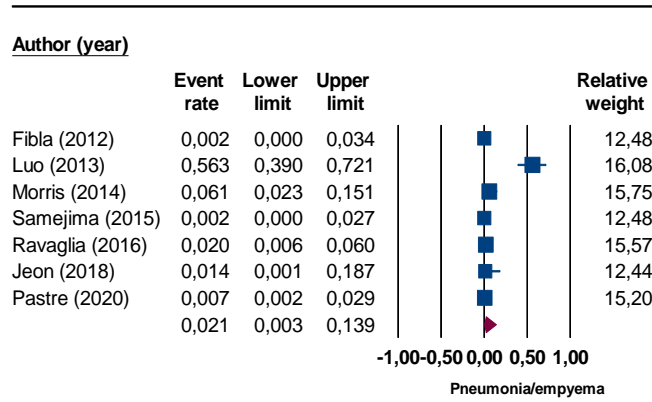

a)

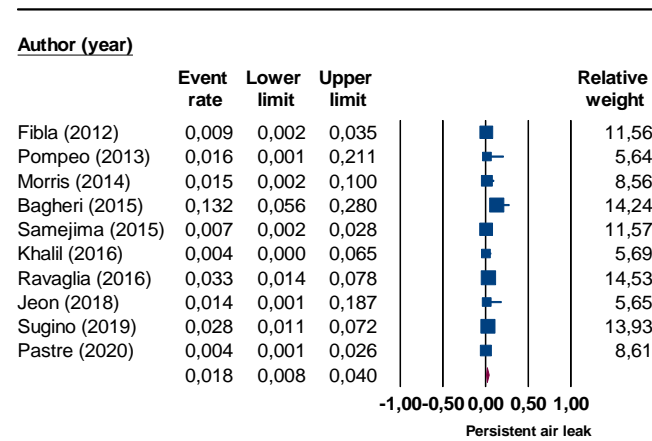

c)

Overall:  $I^2 = 54.5\%$ ;  $p = 0.003$

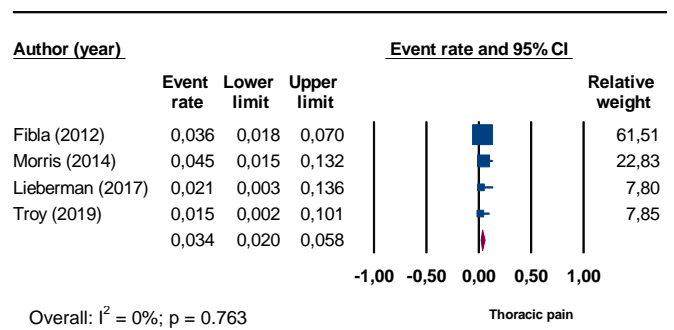

b)

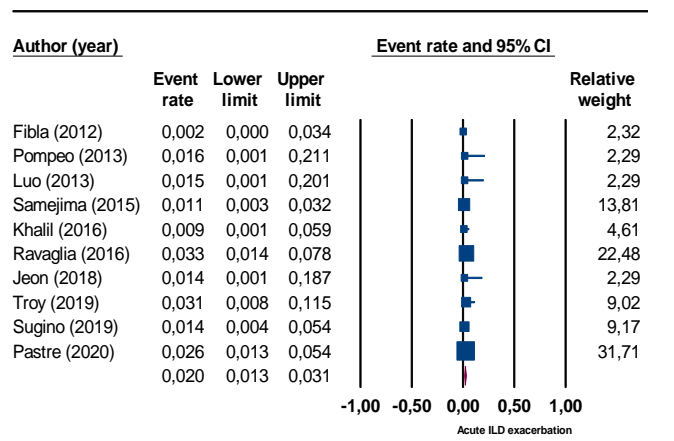

d)

Overall:  $I^2 = 0\%$ ;  $p = 0.635$
